# Supplementary material
Source: bioRxiv or medRxiv preprint supplement (https://medrxiv.org/content/medrxiv/early/2021/07/06/2021.07.04.21259848/DC3/embed/media-3.pdf)
Supplement: Supplementary file [file media-3.pdf]

**Supplementary Table 2:** CD4, CD19 cell count and humoral and cellular anti-SARS CoV2 response in patients in anti-CD20 treated patients: 26, 47 and 49 patients had a treatment interval between last anti-CD20 dose and vaccination of <6, <12 and >12 months, respectively. Fraction of patients, who fulfilled the CD4 cutoff (>653/ul) or CD19 cutoff (>27/ul) and the study visit and fraction of patients who with anti-SARS-CoV2 S1 above a threshold of 1.1 (Index s/c) and interferon-gamma release above 0.15 IU/ml.

|                                                | time since last anti-CD20 |             |             |
|------------------------------------------------|---------------------------|-------------|-------------|
|                                                | <6 months                 | <12 months  | >12 months  |
|                                                | n = 26                    | n = 47      | n = 49      |
| <b>CD4 cells &gt; 653/ul</b>                   | 11/22 (50%)               | 18/41 (44%) | 22/39 (56%) |
| <b>CD19 cells &gt; 27/ul</b>                   | 2/22 (9.1%)               | 8/41 (20%)  | 24/39 (62%) |
| <b>anti-SARS-CoV2 S1 positive</b>              | 5/26 (19%)                | 17/47 (36%) | 30/49 (61%) |
| <b>INF<math>\gamma</math> release positive</b> | 3/16 (19%)                | 6/31 (19%)  | 7/35 (20%)  |
